# Supplementary material for: Nucleosome positioning stability is a modulator of germline mutation rate variation across the human genome
Source: PubMed Central journal article supplement (PMC7070026; doi:10.1038/s41467-020-15185-0), 2020-03-13
Supplement: 41467_2020_15185_MOESM3_ESM.pdf [file 41467_2020_15185_MOESM3_ESM.pdf]

## Description of Additional Supplementary Files

File Name: Supplementary Data 1

Description: Coefficients of variables and other information from the full regression models for different mutation types.

File Name: Supplementary Data 2

Description: Results of likelihood ratio tests (LRT) and the McFadden's pseudo R<sup>2</sup> of full and reduced models.
